# Supplementary material for: Discovery of new BTK inhibitors with B cell suppression activity bearing a 4,6-substituted thieno[3,2-d]pyrimidine scaffold
Source: Royal Society of Chemistry journal article supplement (doi:10.1039/c7ra04261b), 2017-01-01
Supplement: c7ra04261b1.pdf [file c7ra04261b1.pdf]

## Supplementary Information

### Discovery of new BTK inhibitors with B cells suppression activity bearing a 4, 6-substituted thieno[3,2-*d*]pyrimidine scaffold

Qiumeng Zhang,<sup>‡a</sup> Luyao Zhang,<sup>‡bc</sup> Jie Yu,<sup>a</sup> Heng Li,<sup>bc</sup> Shijun He,<sup>bc</sup> Wei Tang,<sup>bc</sup> Jianping Zuo<sup>\*bc</sup> and Wei Lu<sup>\*a</sup>

<sup>a</sup> School of Chemistry and Molecular Engineering, East China Normal University, 3663 North Zhongshan Road, Shanghai 200062, P. R. China.

*E-mail: wlu@chem.ecnu.edu.cn; Tel.: +86-21-62238771*

<sup>b</sup> Laboratory of Immunopharmacology, Shanghai institute of Materia Medica, Chinese Academy of Sciences, Shanghai 201203, P. R. China

*E-mail: jpzuo@simm.ac.cn; Tel.: +86-21-50801659*

<sup>c</sup> University of Chinese Academy of Sciences, NO.19A Yuquan Road, Beijing 100049, P. R. China

<sup>‡</sup> These authors contributed equally

## Contents

|                                                                                                                                           |     |
|-------------------------------------------------------------------------------------------------------------------------------------------|-----|
| Table of contents                                                                                                                         | S 1 |
| HPLC methods for determine the purity of compounds <b>4-20</b>                                                                            | S 2 |
| Spectral copies of <sup>1</sup> H NMR, <sup>13</sup> C NMR and TOF MS ES <sup>+</sup> of compounds <b>4-13</b> , <b>15</b> and <b>19</b>  | S 3 |
| Spectral copies of <sup>1</sup> H NMR and TOF MS ES <sup>+</sup> of compounds <b>14</b> , <b>16</b> , <b>17</b> , <b>18</b> and <b>20</b> | S4  |
| The IC <sub>50</sub> curves of compounds 7, 8 and Olmutinib against BTK and EGFR                                                          | S5  |

#### **HPLC methods for determine the purity of 4-20.**

The purity of all tested compounds was established by HPLC to be > 95%. HPLC analysis was performed at room temperature using a Diamonsil C<sub>18</sub> (250 mm × 4.6 mm).

Method 1: A mobile phase gradient from 5% MeCN/water (10% MeOH /H<sub>2</sub>O) to 95% MeCN/water (10% MeOH /H<sub>2</sub>O) for 20 min, a flow rate of 1.0 mL/min. This method was used to determine the purity for compound **4**.

Method 2: A mobile phase gradient from 5% CH<sub>3</sub>CN/ buffer (0.1% TFA/H<sub>2</sub>O) to 95% MeCN/ buffer (0.1% TFA/H<sub>2</sub>O) for 9 min, then kept the ratio for 6 min, a flow rate of 1.0 mL/min. This method was used to determine the purity for compounds **5-20**.

Spectrum of compound **4**

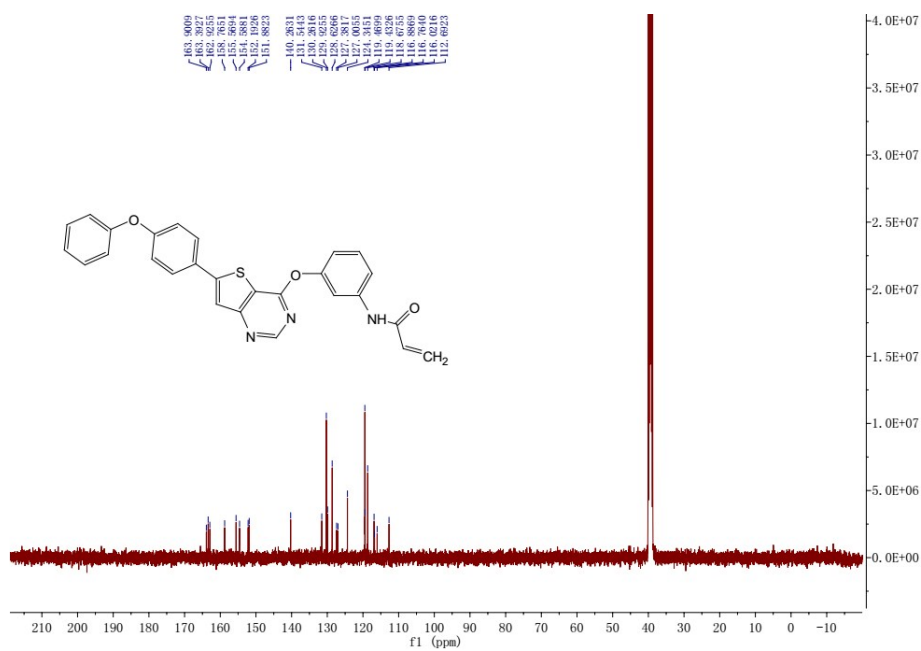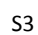

# Spectrum of compound 5

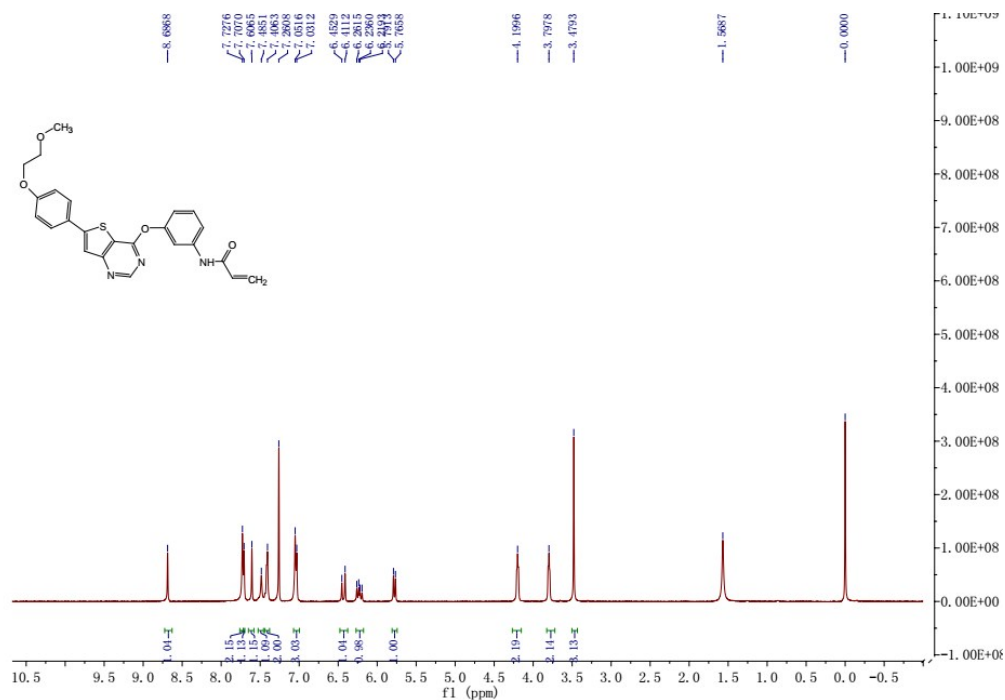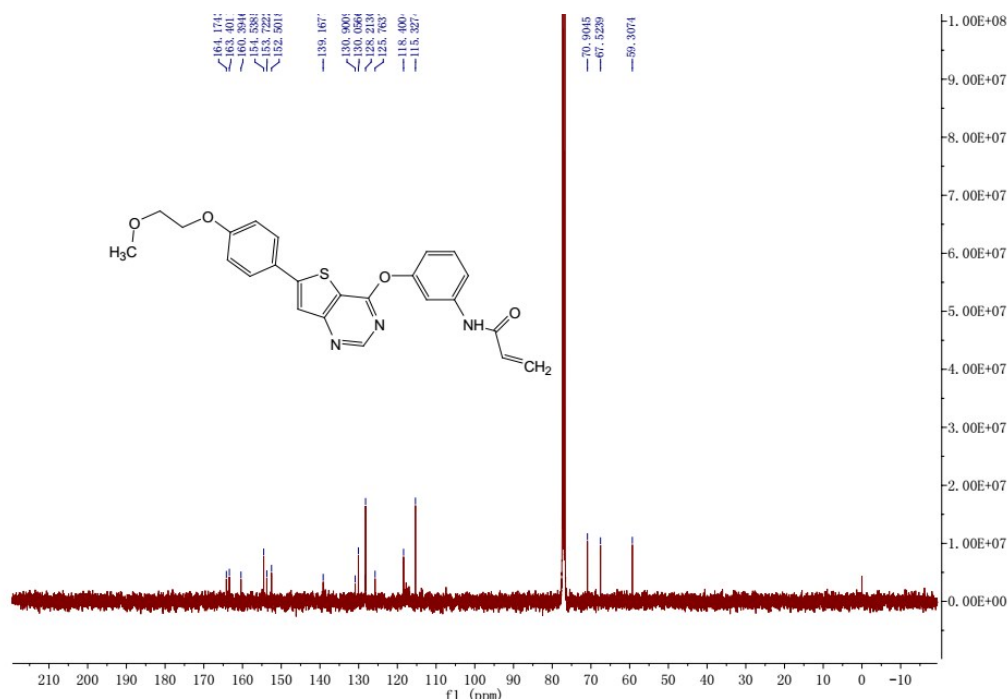

1: TOF MS<sup>ES+</sup>

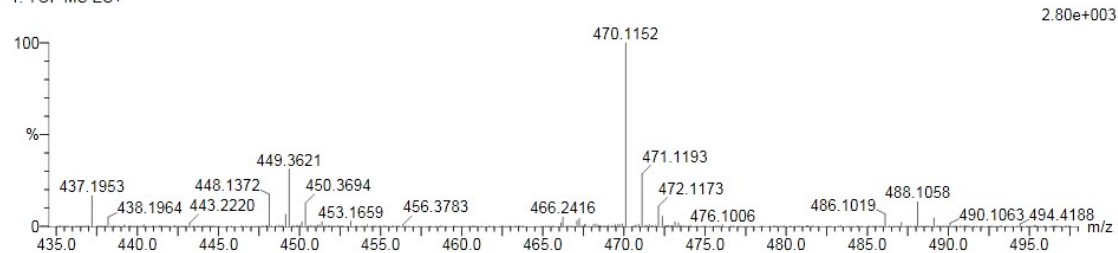

# Spectrum of compound 6

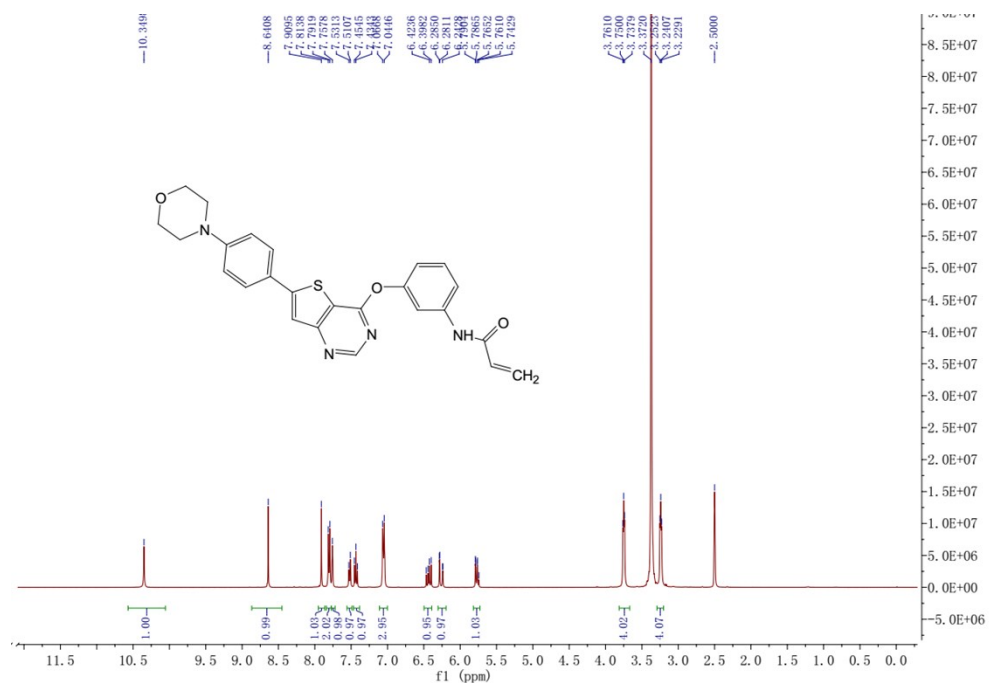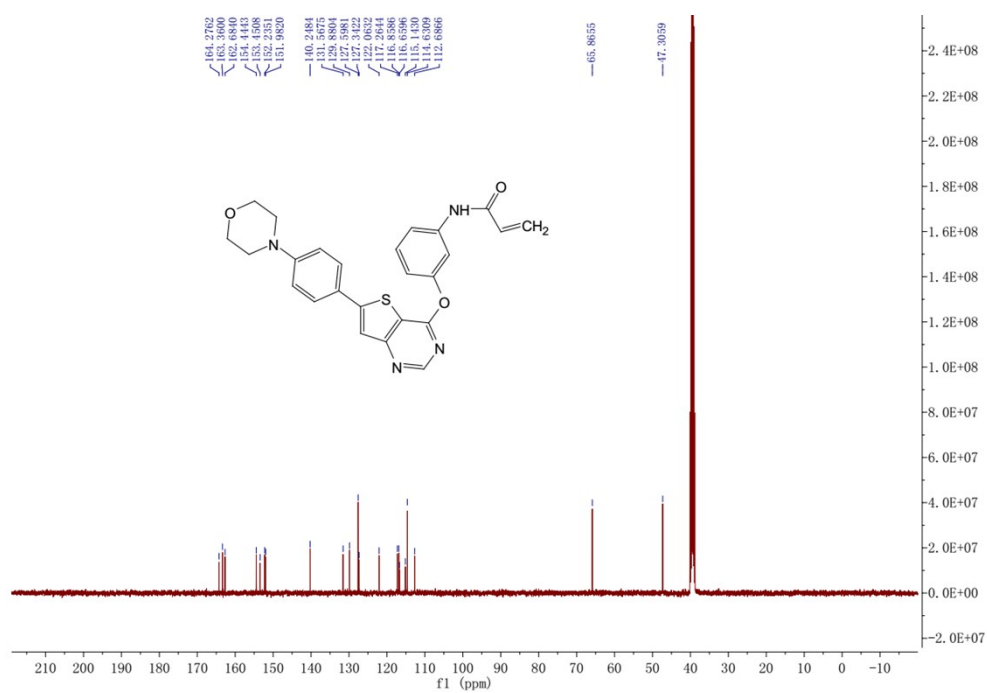

1: TOF MS ES+

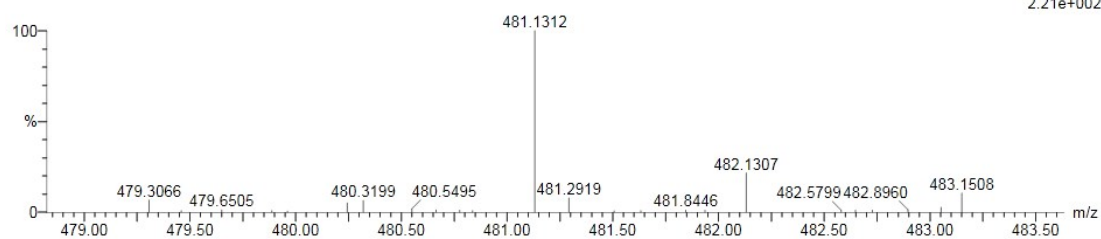

2.21e+002

# Spectrum of compound **7**

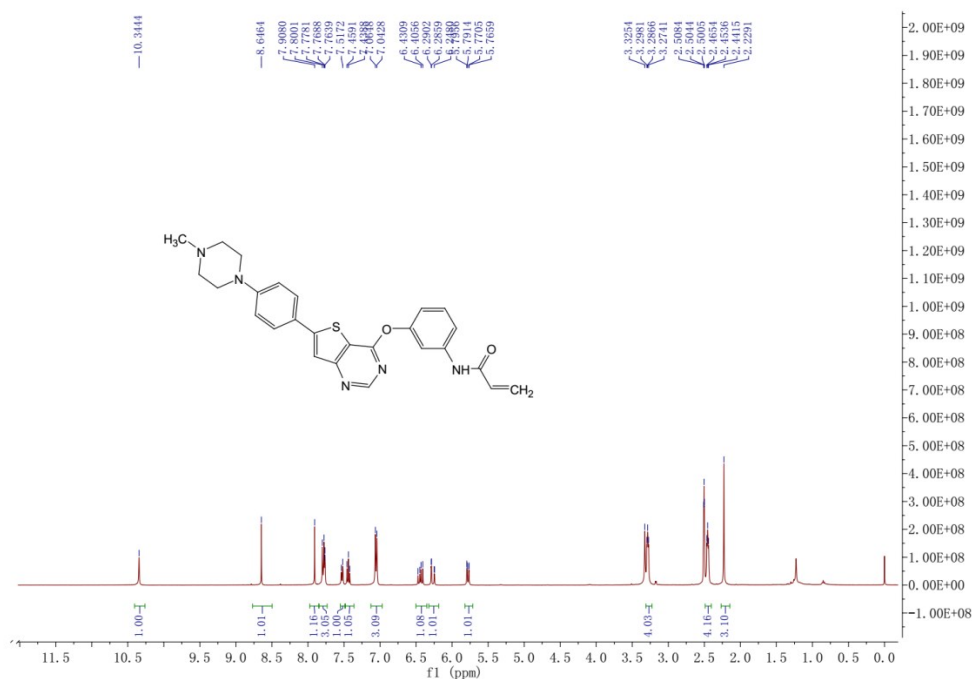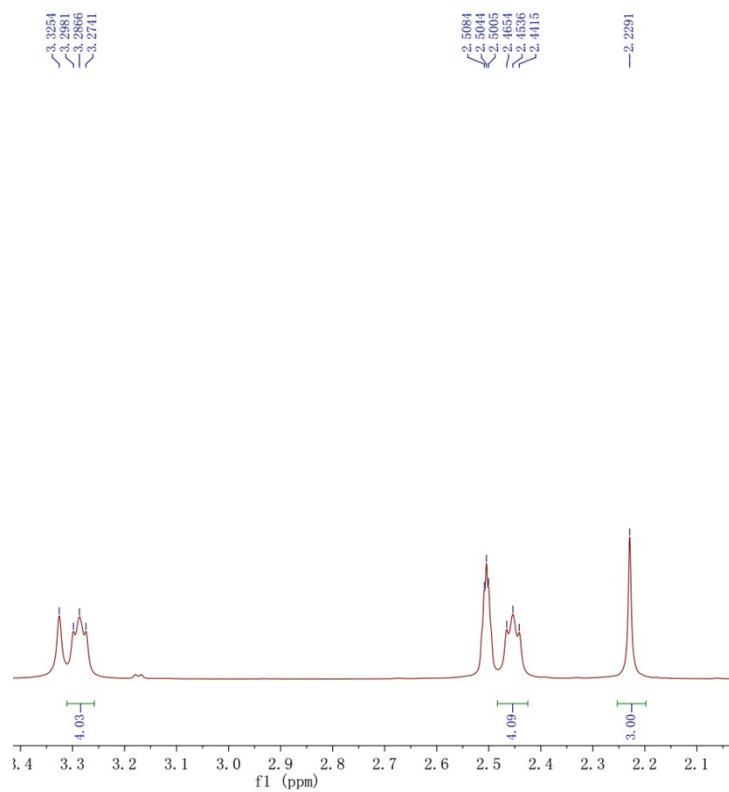

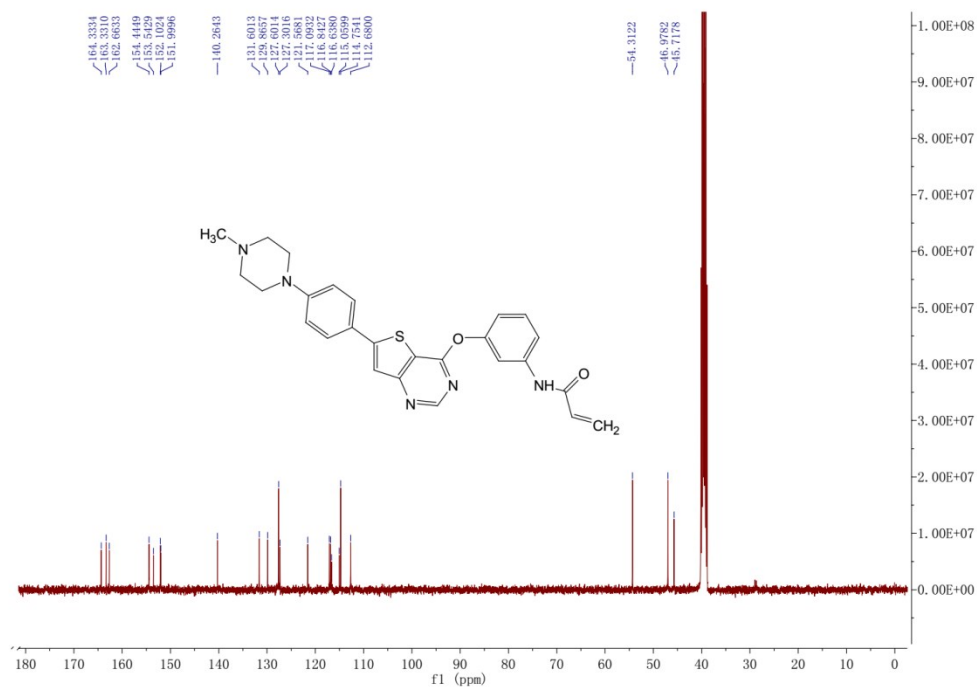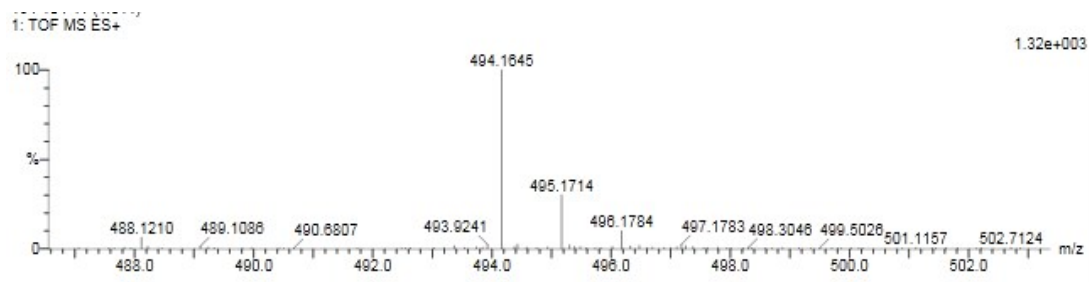

# Spectrum of compound **8**

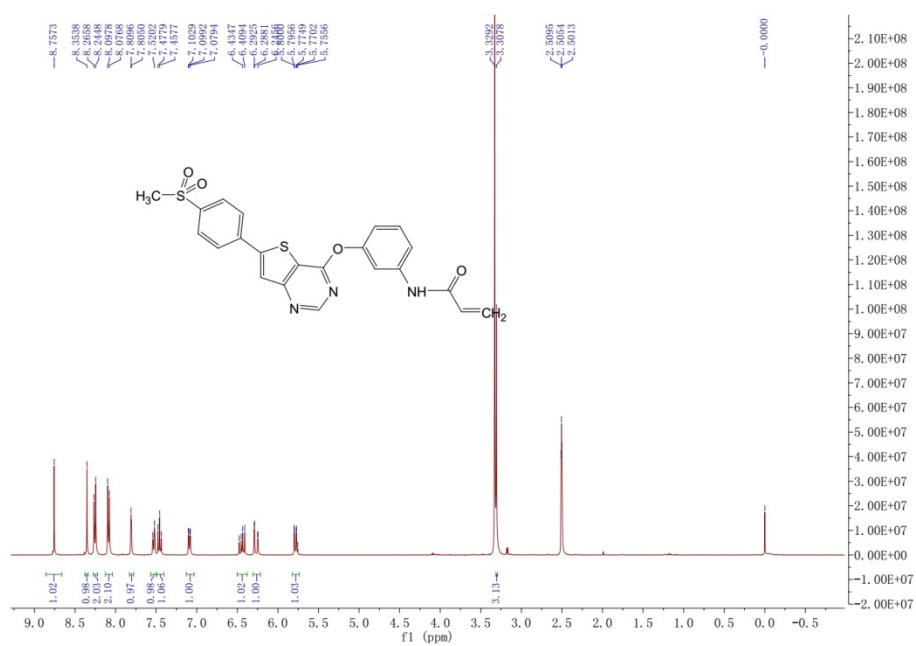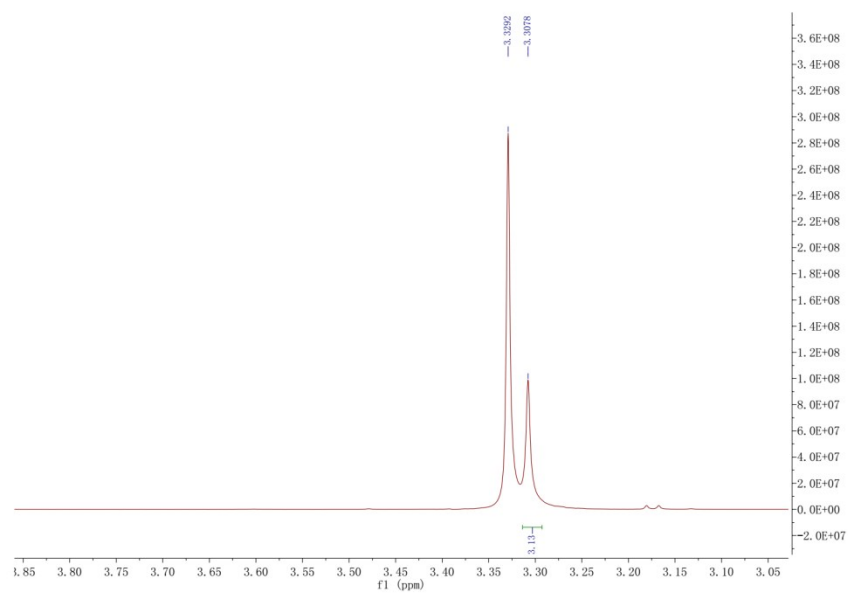



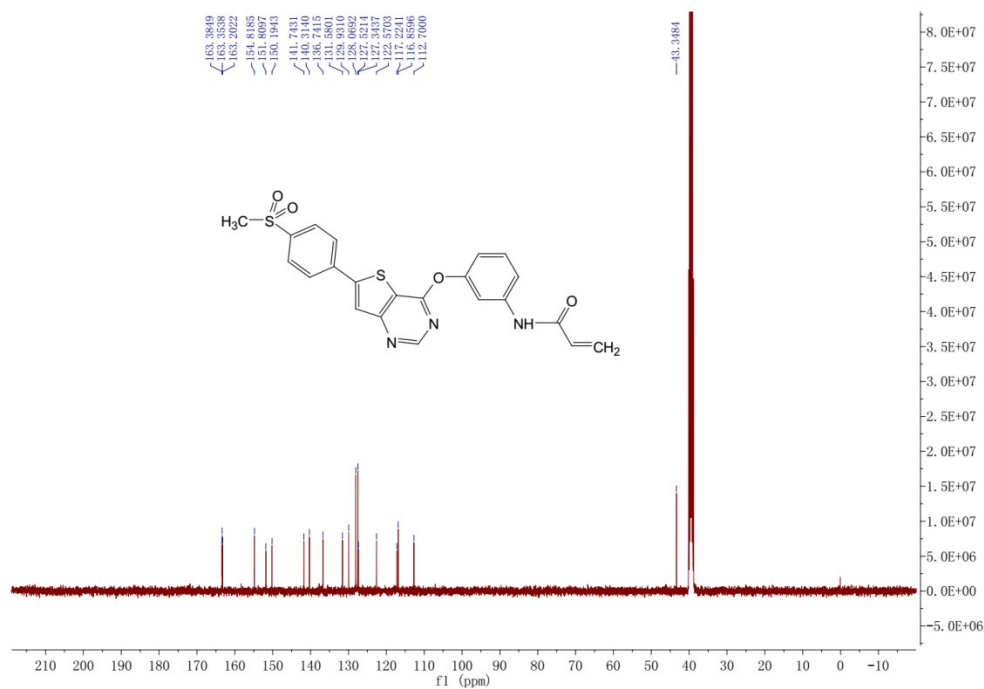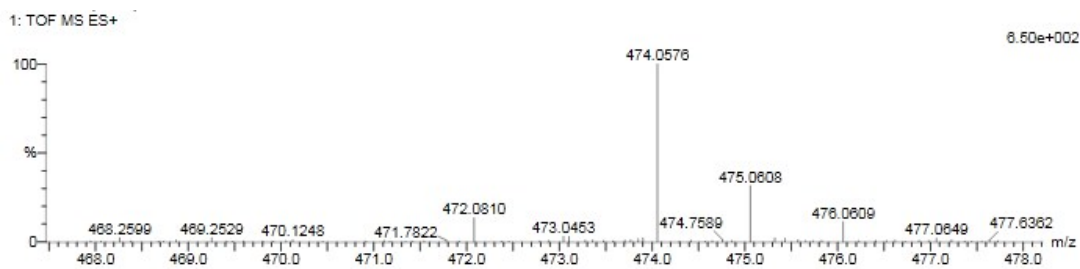

# Spectrum of compound 9

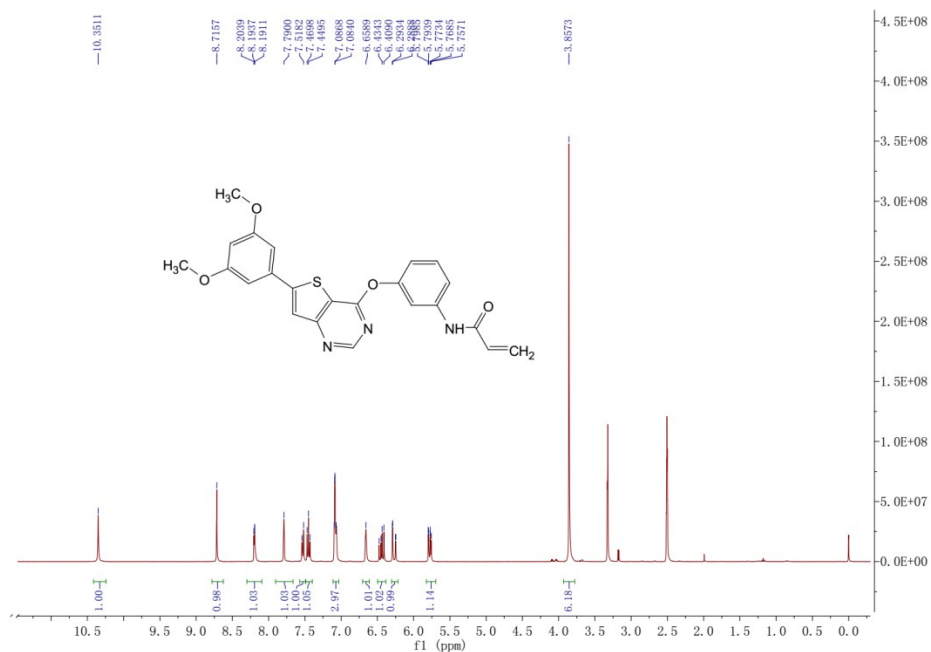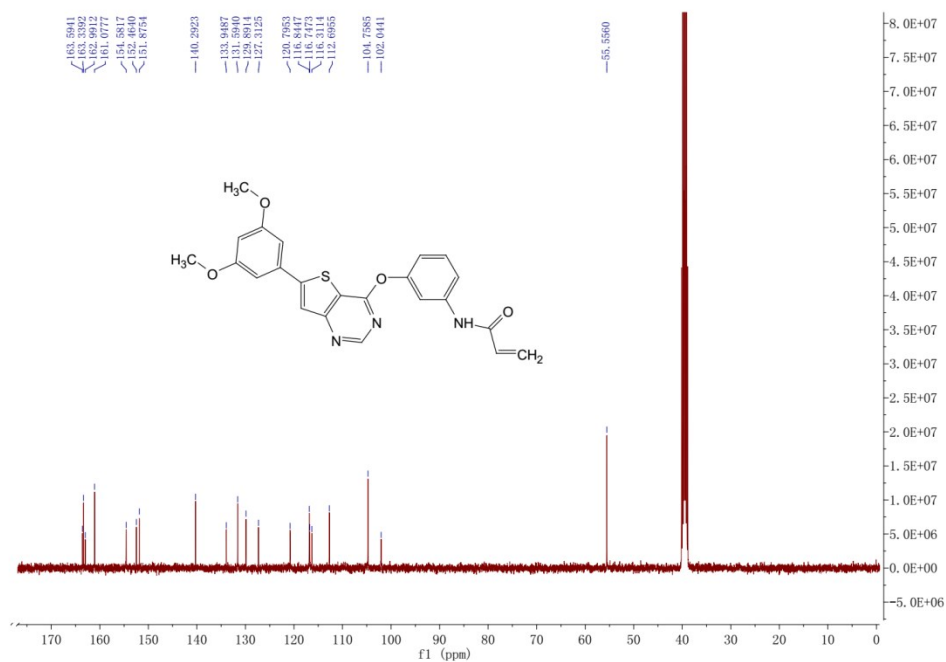

1: TOF MS ES<sup>+</sup>

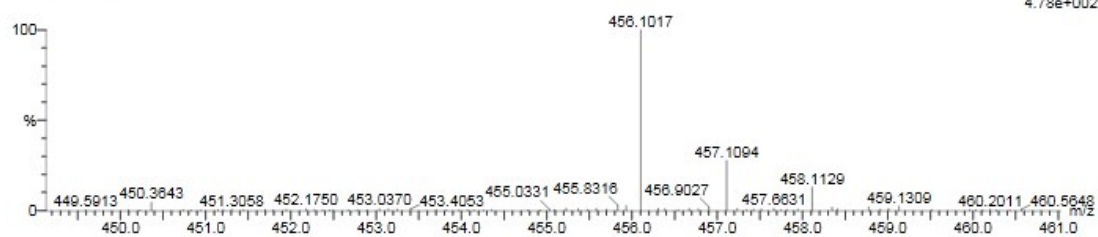

# Spectrum of compound 10

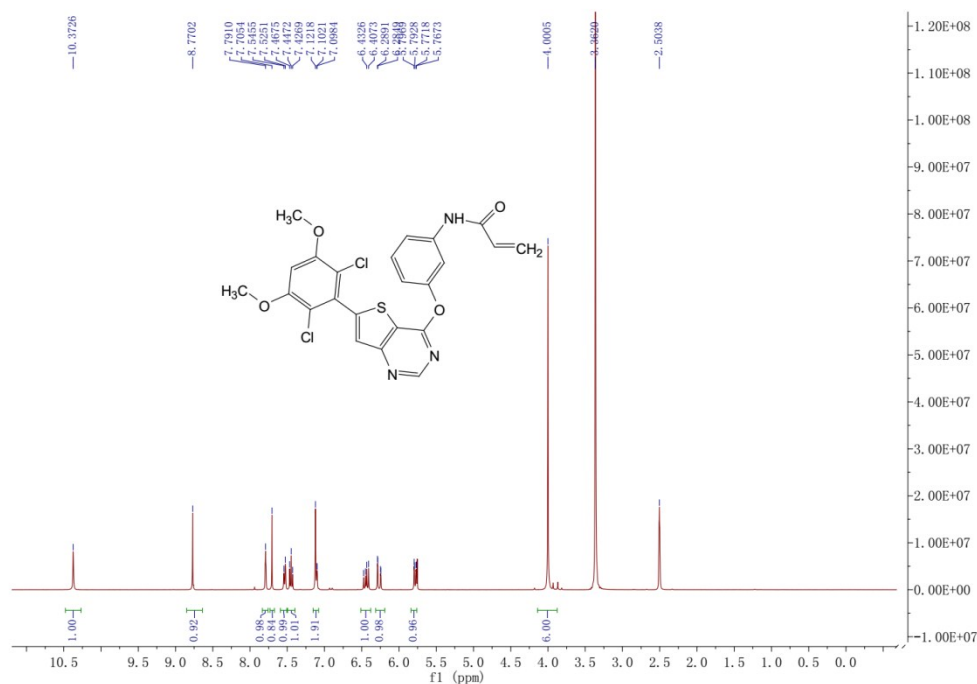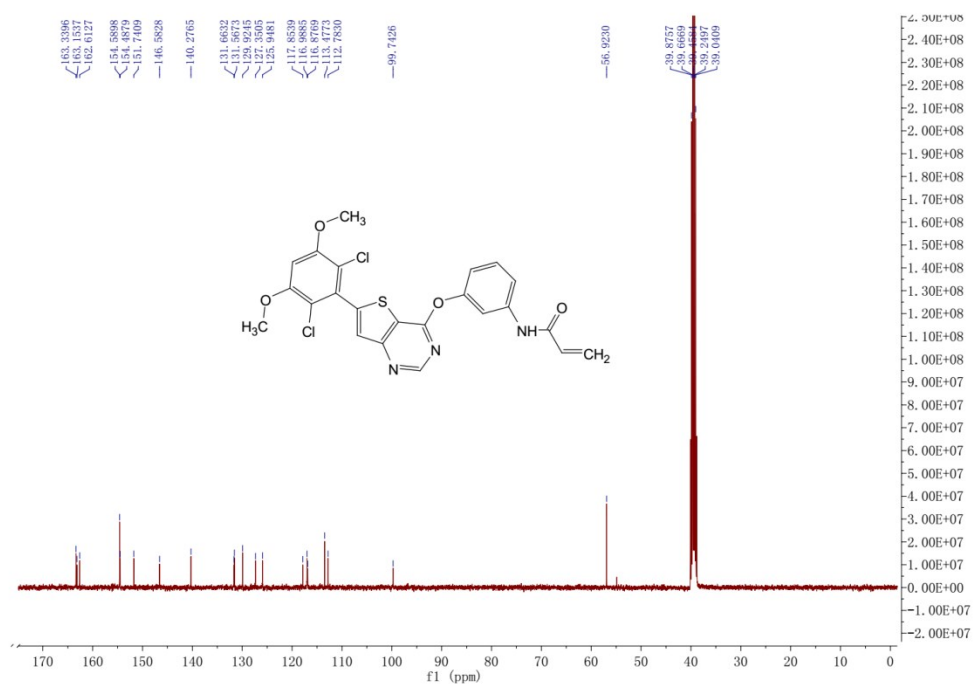

1: TOF MS ES+

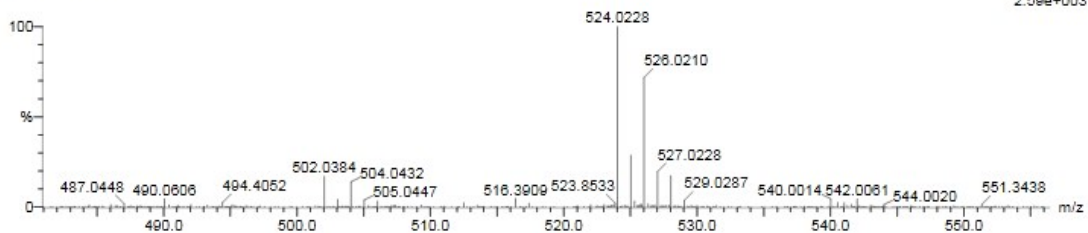

# Spectrum of compound **11**

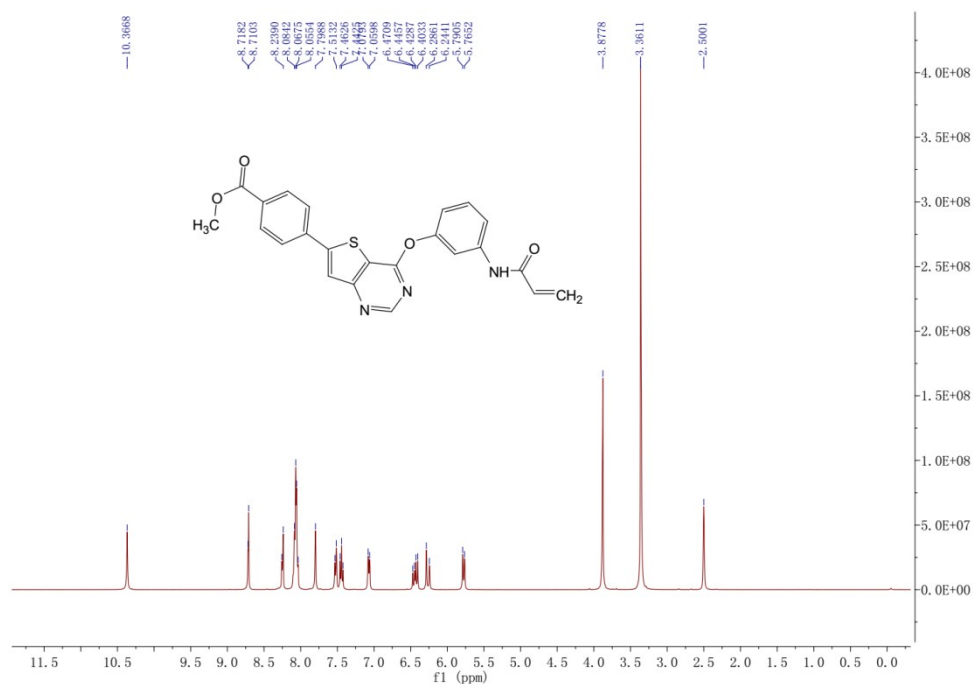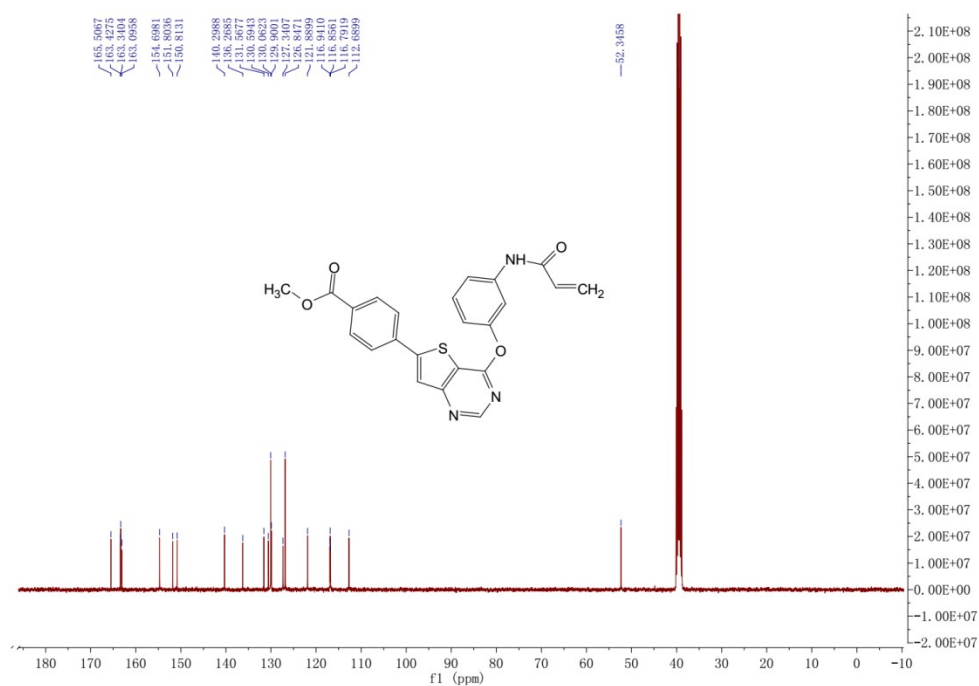

1: TOF MS ES<sup>+</sup>

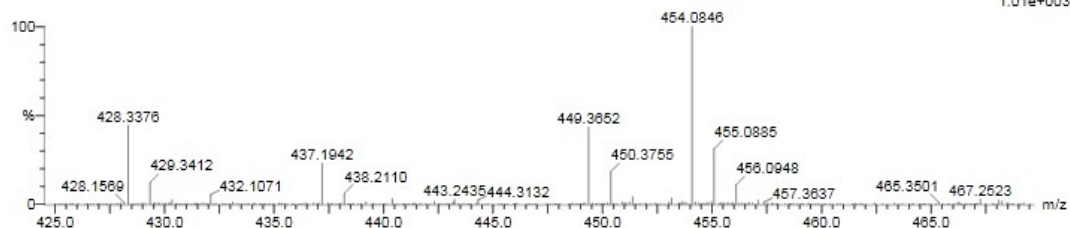

# Spectrum of compound **12**

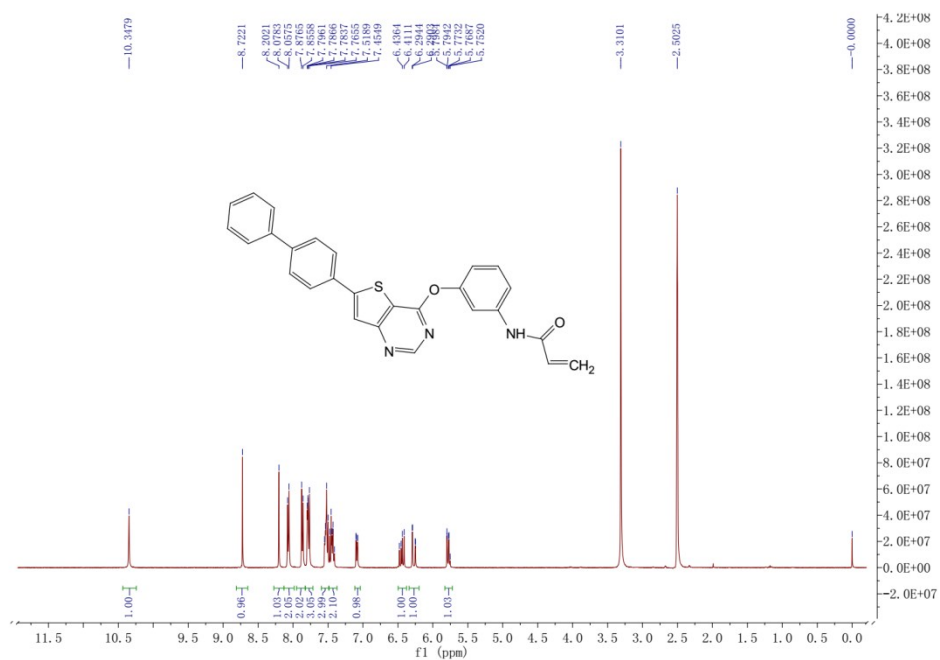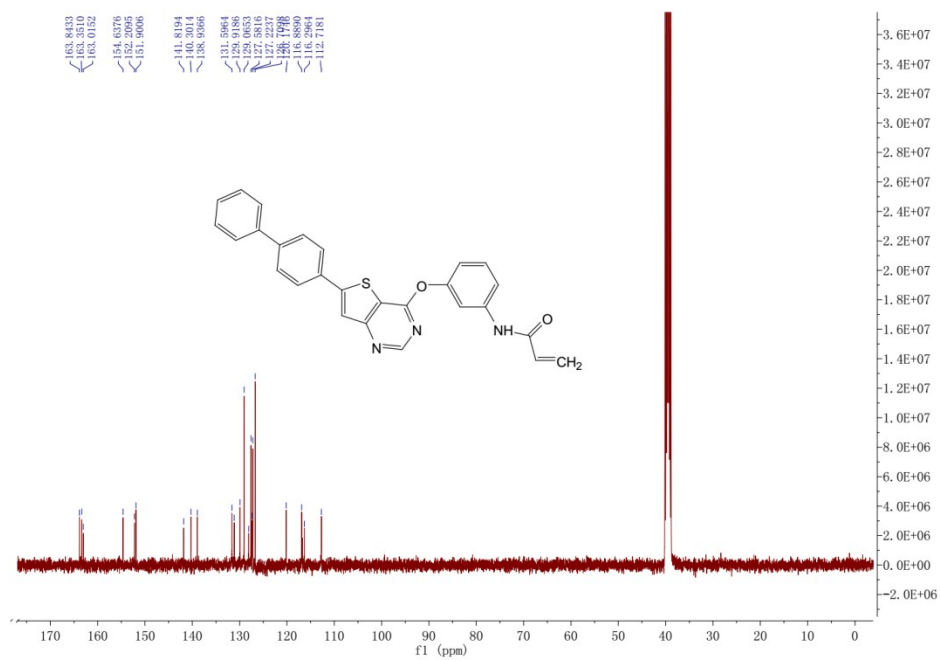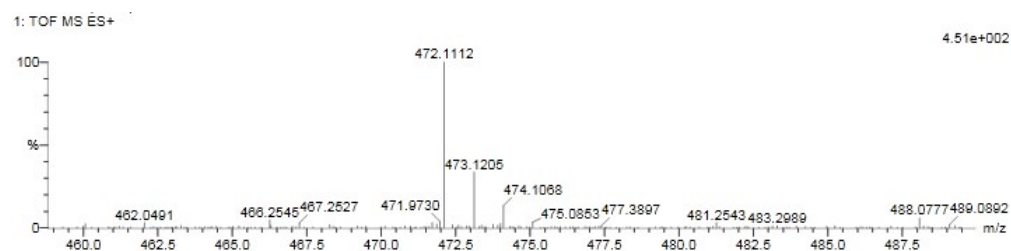

# Spectrum of compound **13**

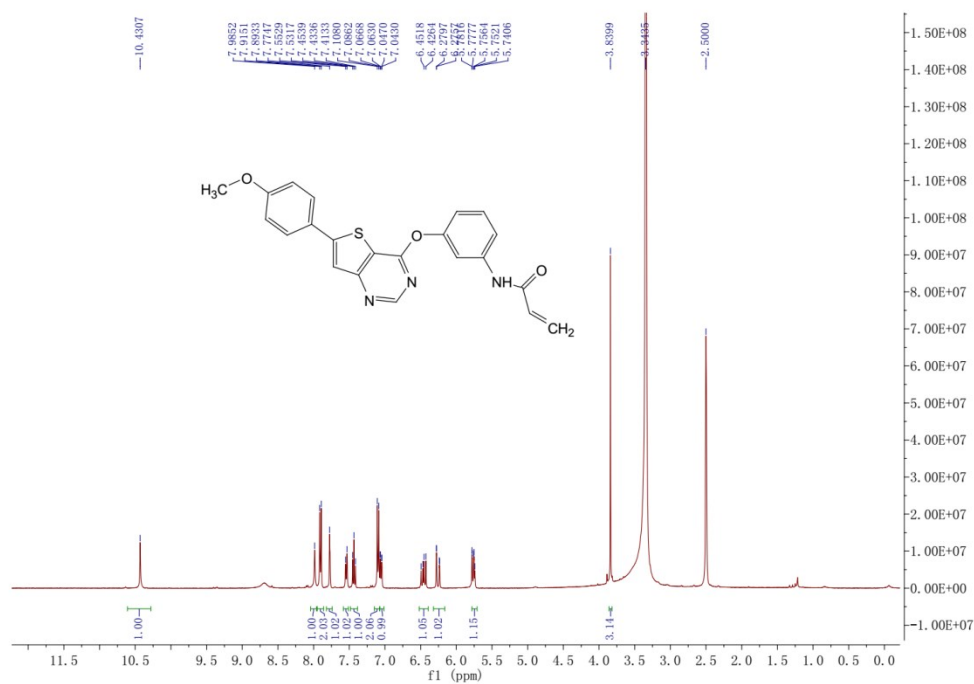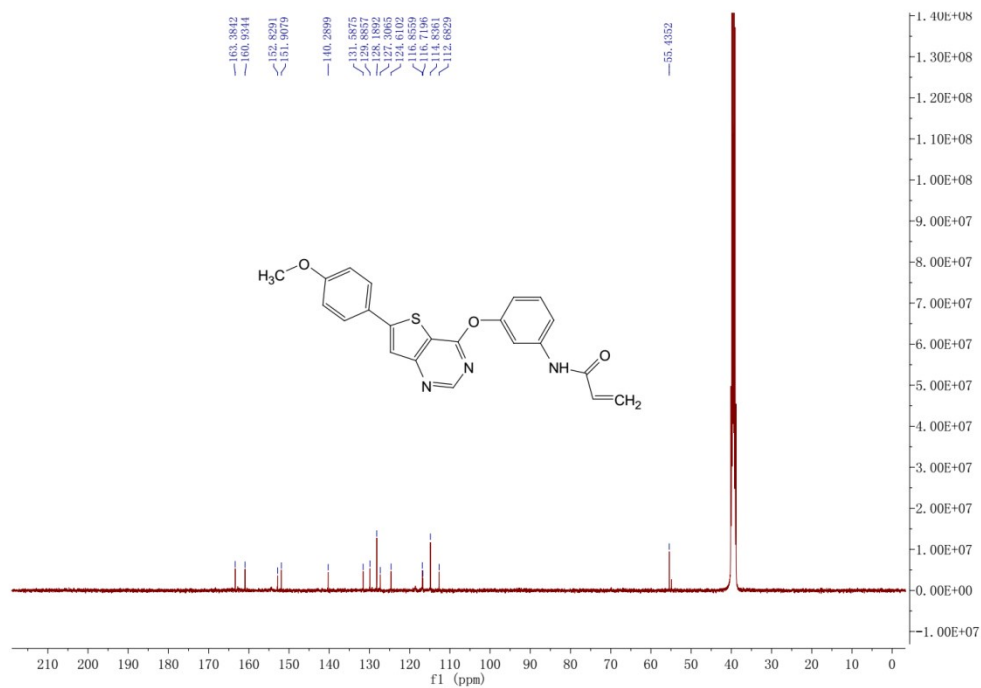

1: TOF MS ES+

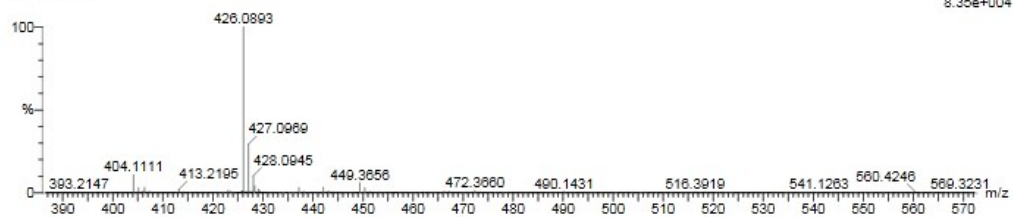

# Spectrum of compound **15**

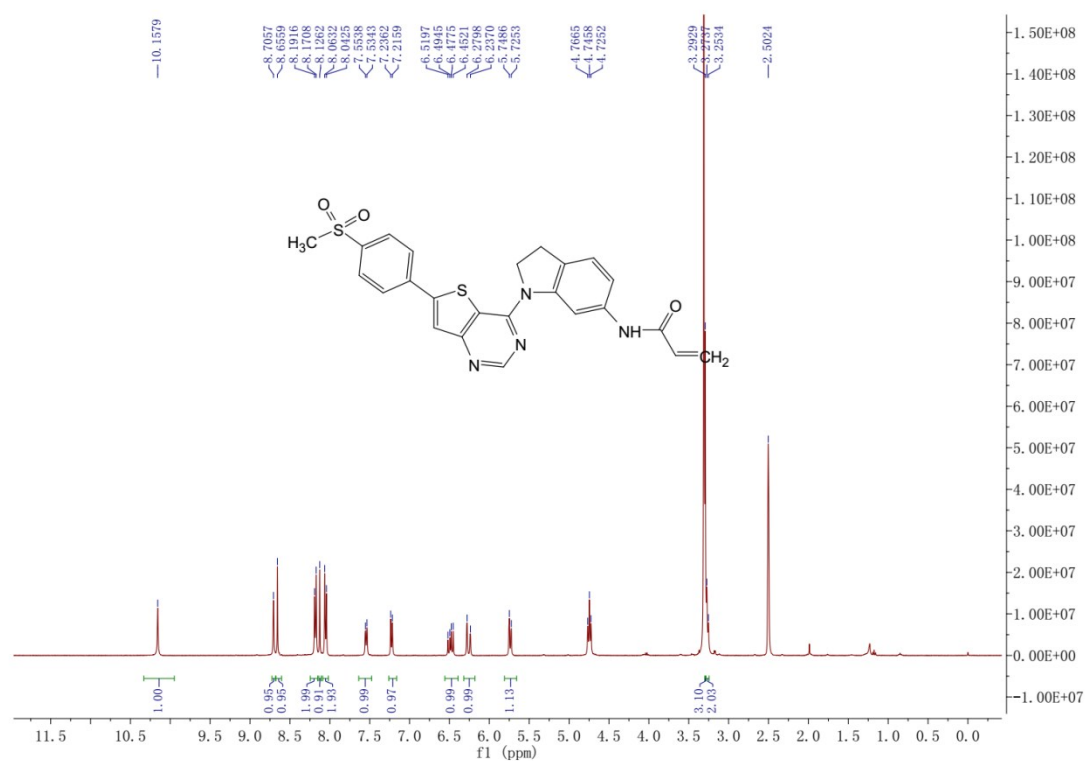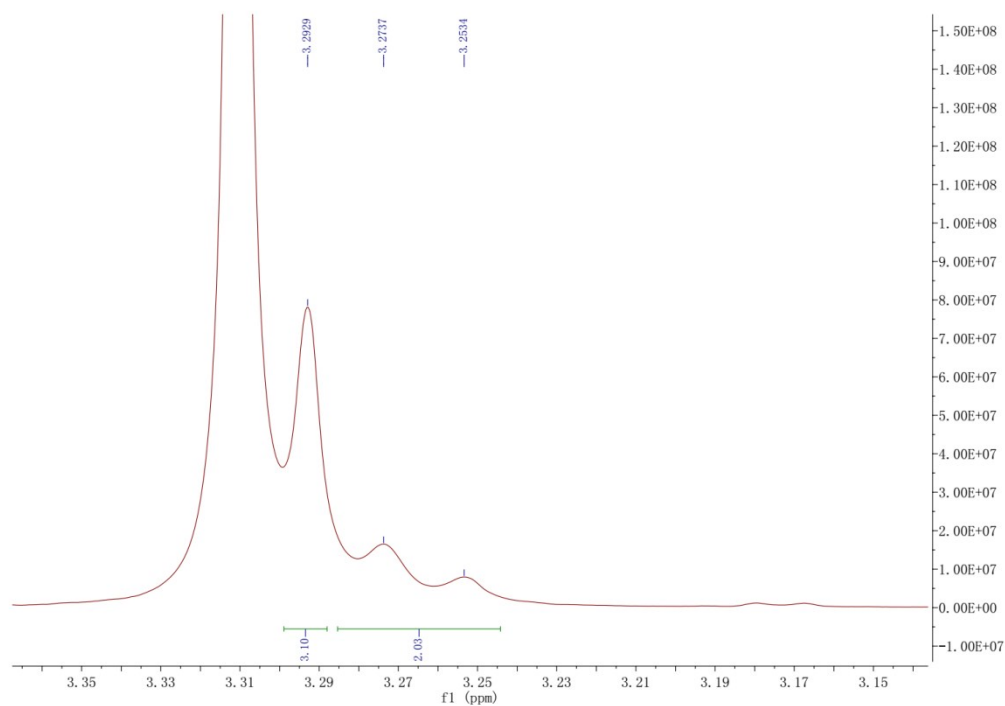

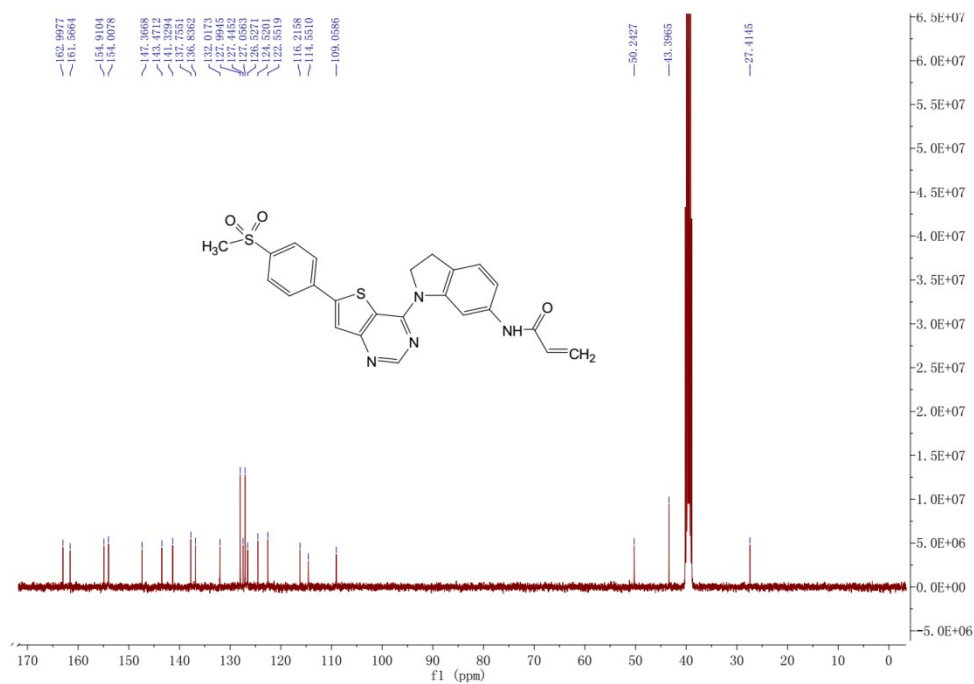

1: TOF MS ES+

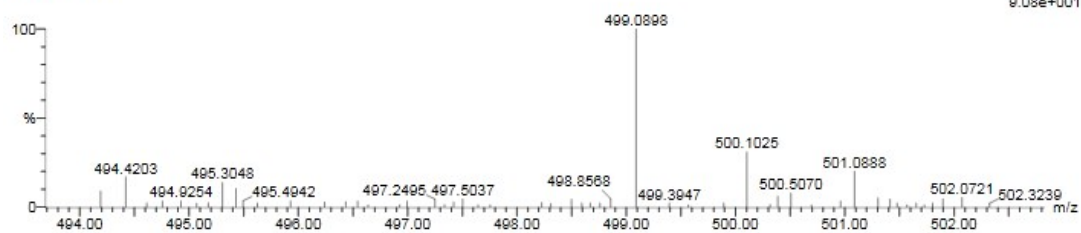



# Spectrum of compound **19**

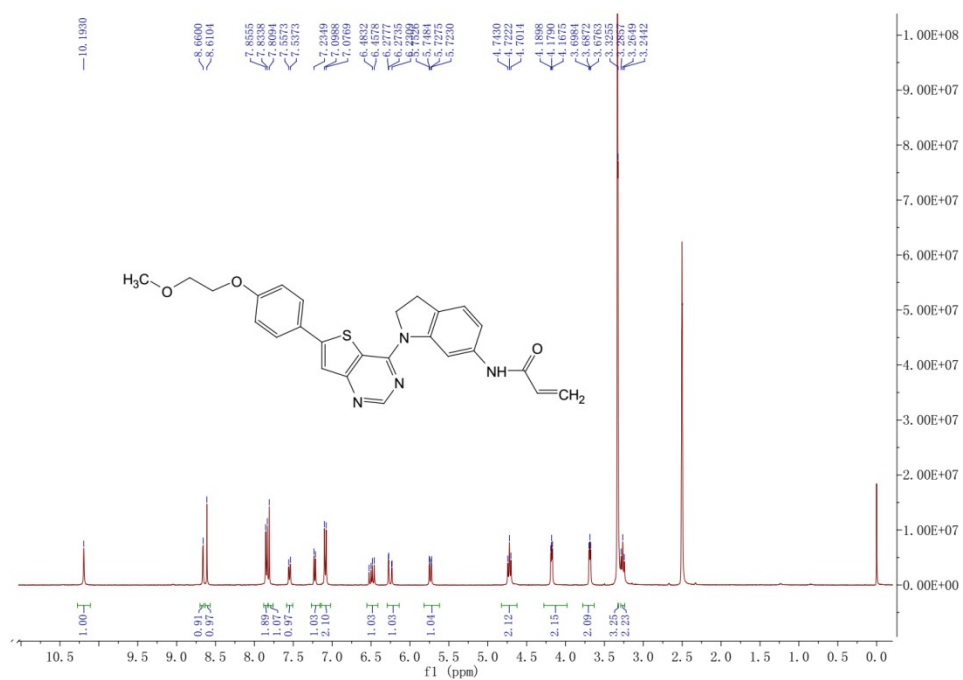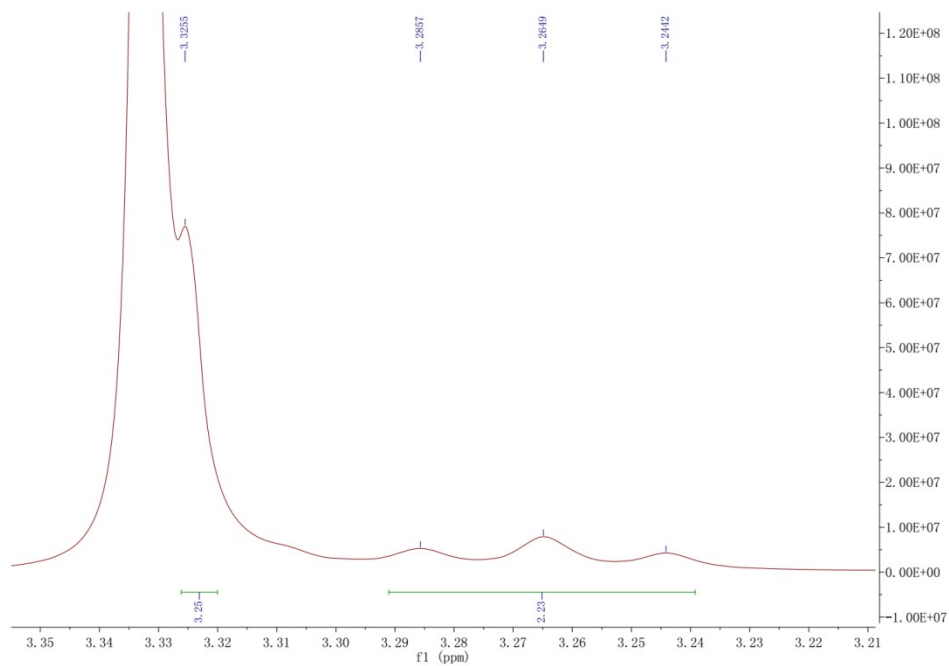

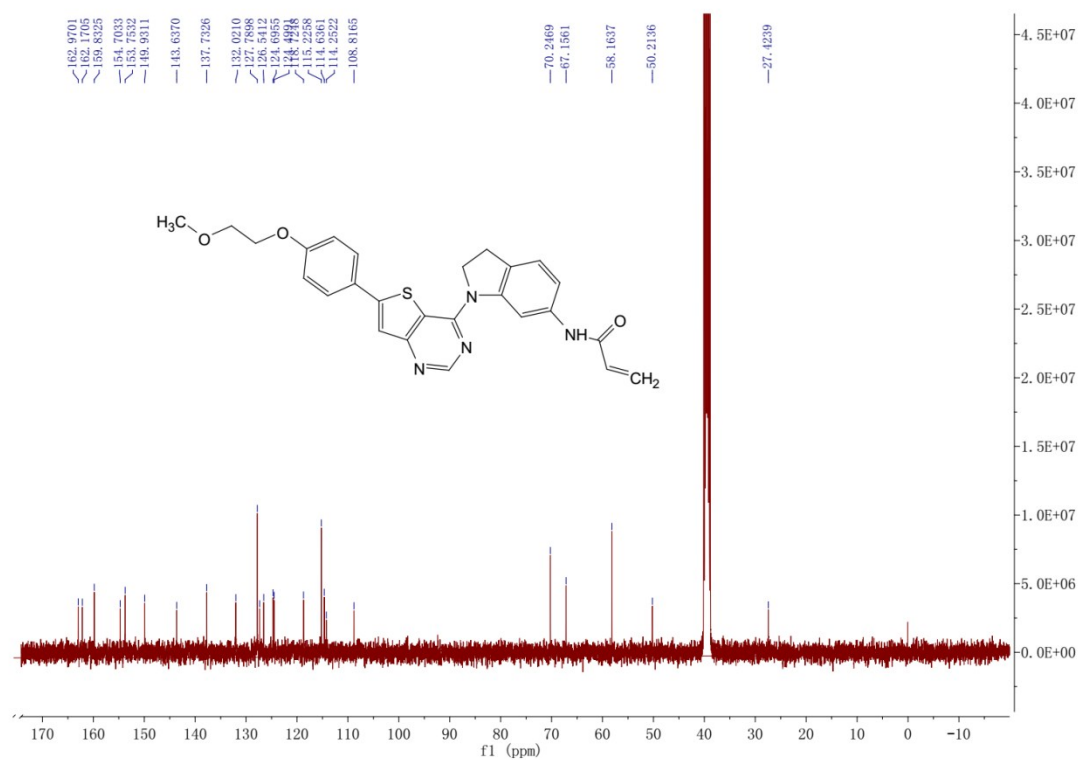

1: TOF MS ES+

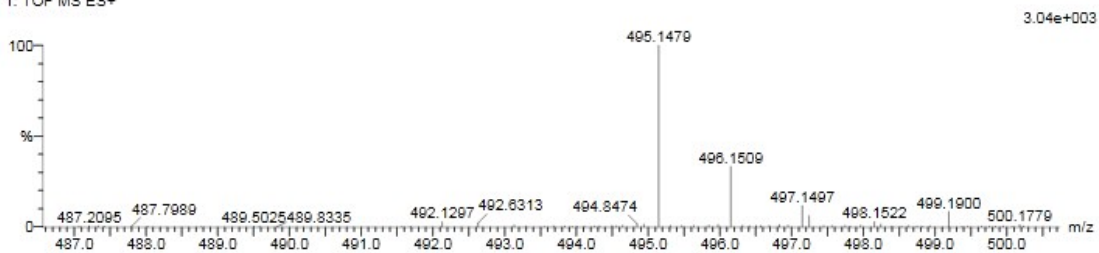

**Spectral copies of  $^1\text{H}$  NMR and TOF MS ES<sup>+</sup> of compounds 14, 16, 17, 18 and 20**  
 (Compounds 14, 16, 17, 18 and 20 have poor solubilities and their  $^{13}\text{C}$  NMR data were hard to get)

**Spectrum of compound 14**

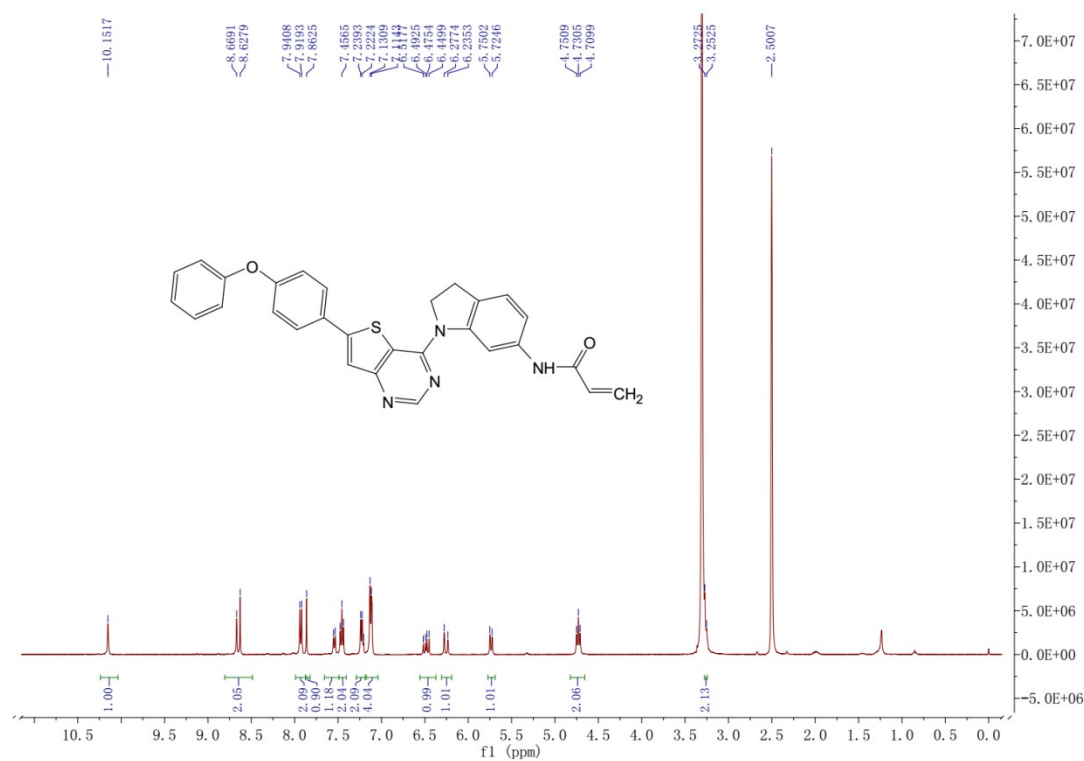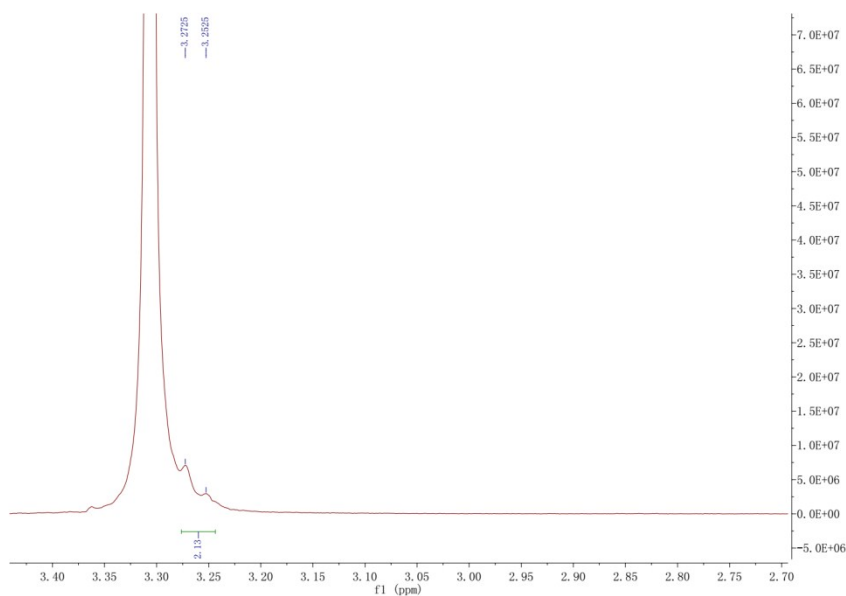

1: TOF MS ES<sup>+</sup>

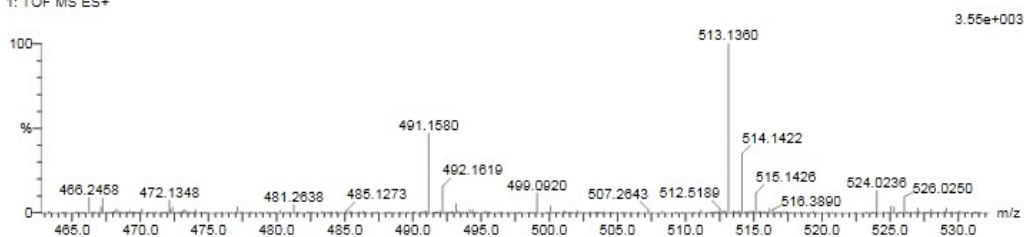

# Spectrum of compound **16**

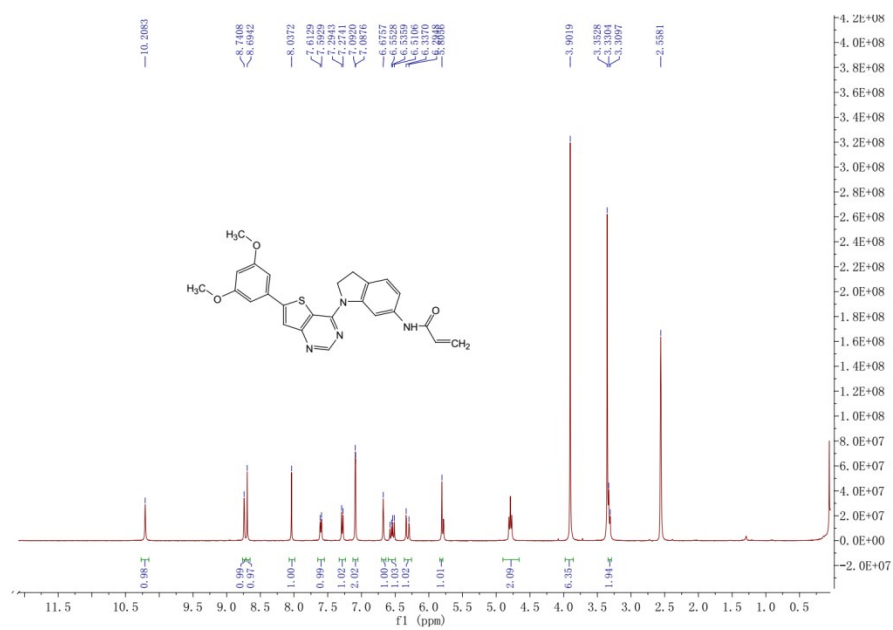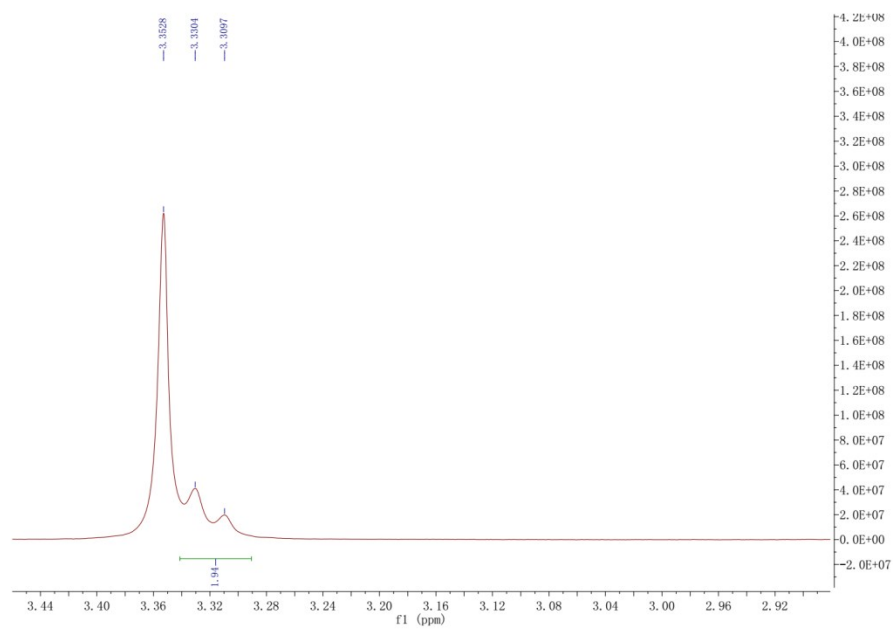

1: TOF MS ES+

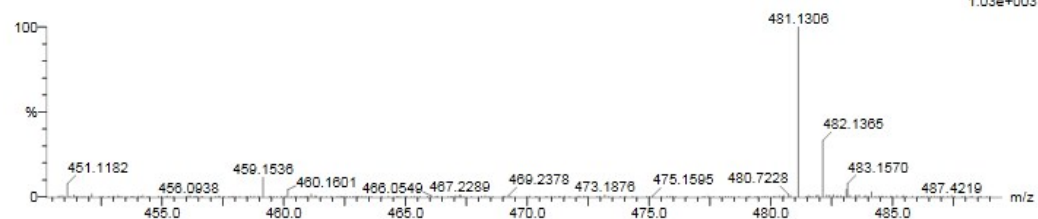

# Spectrum of compound **17**

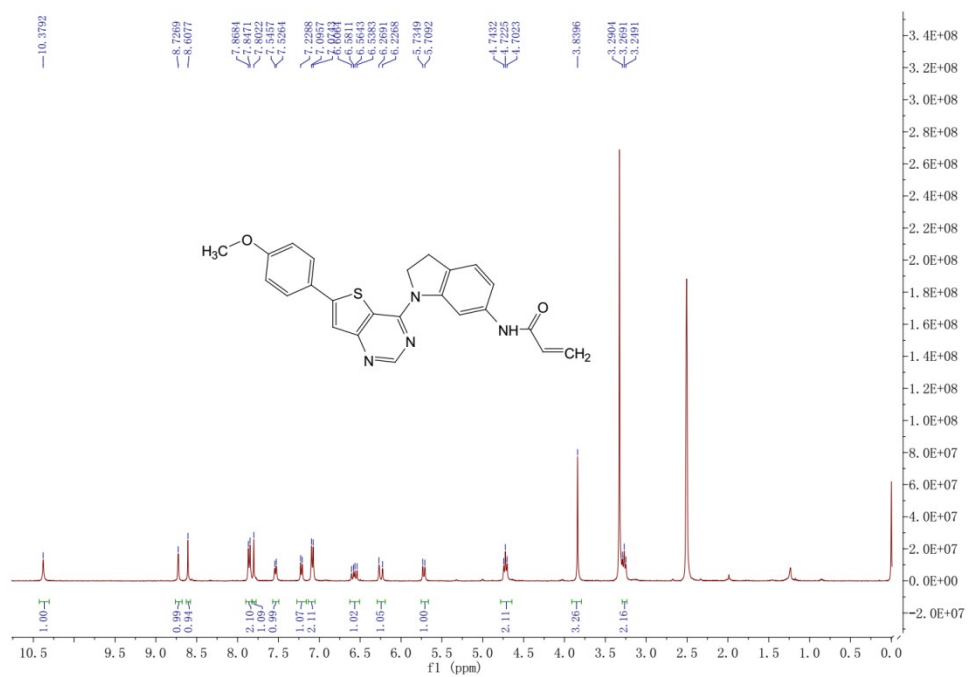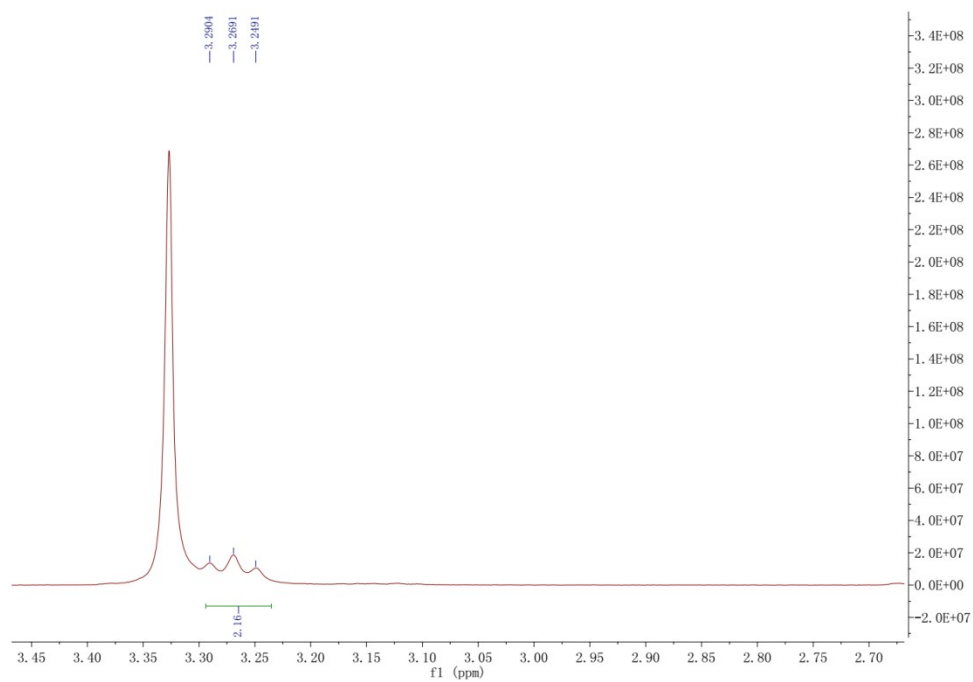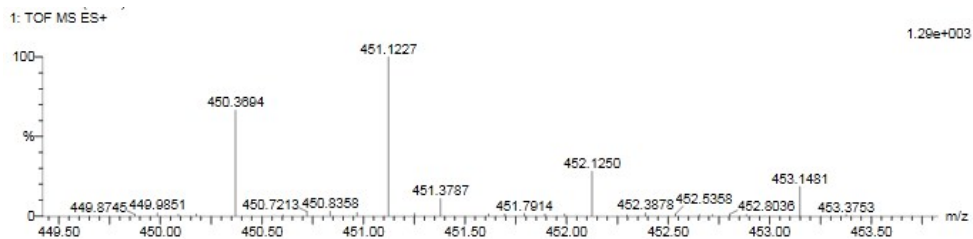

# Spectrum of compound **18**

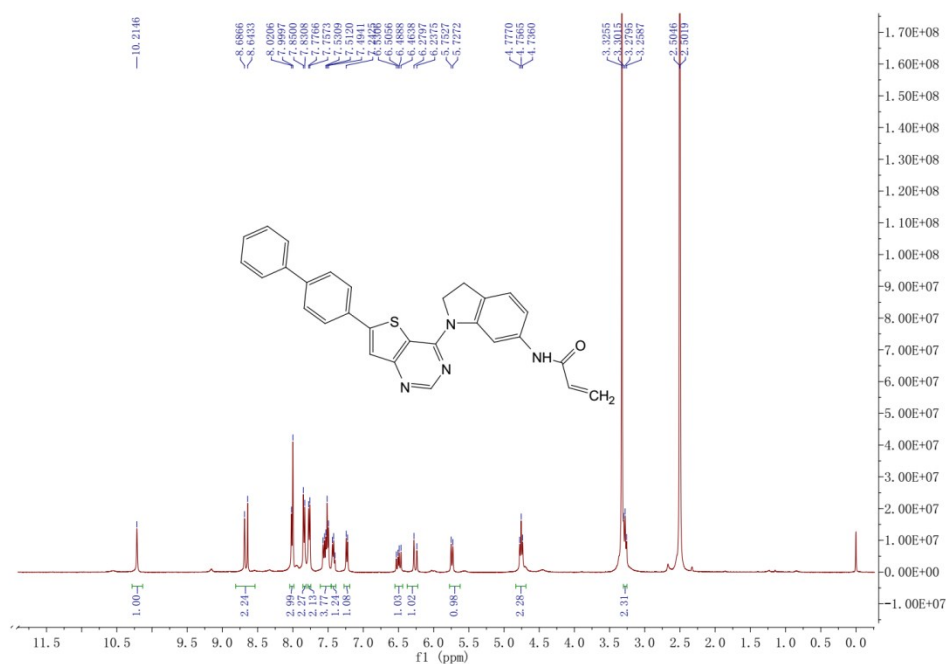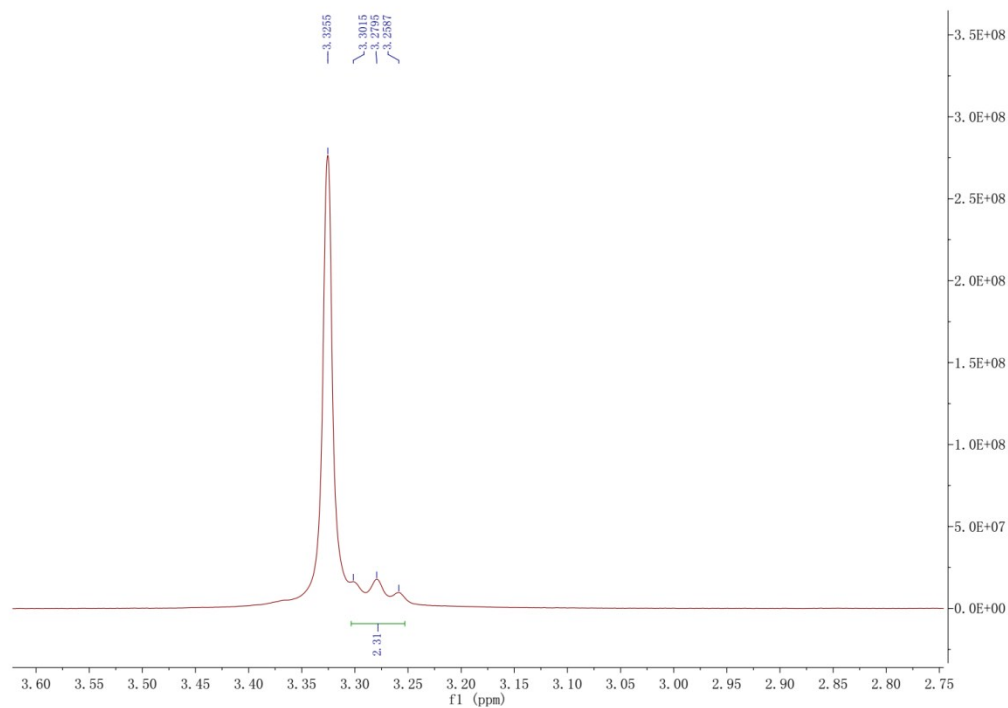

## 1: TOF MS ES+

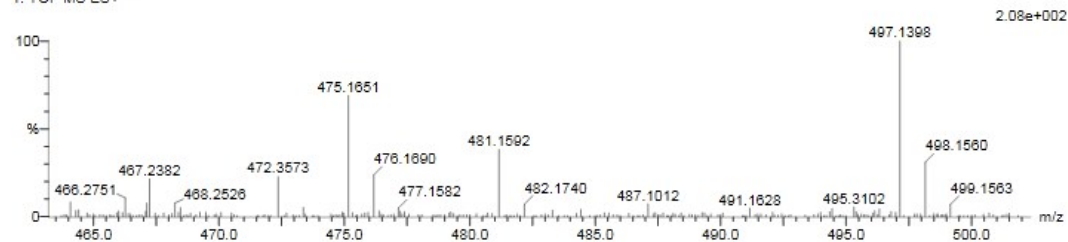

# Spectrum of compound **20**

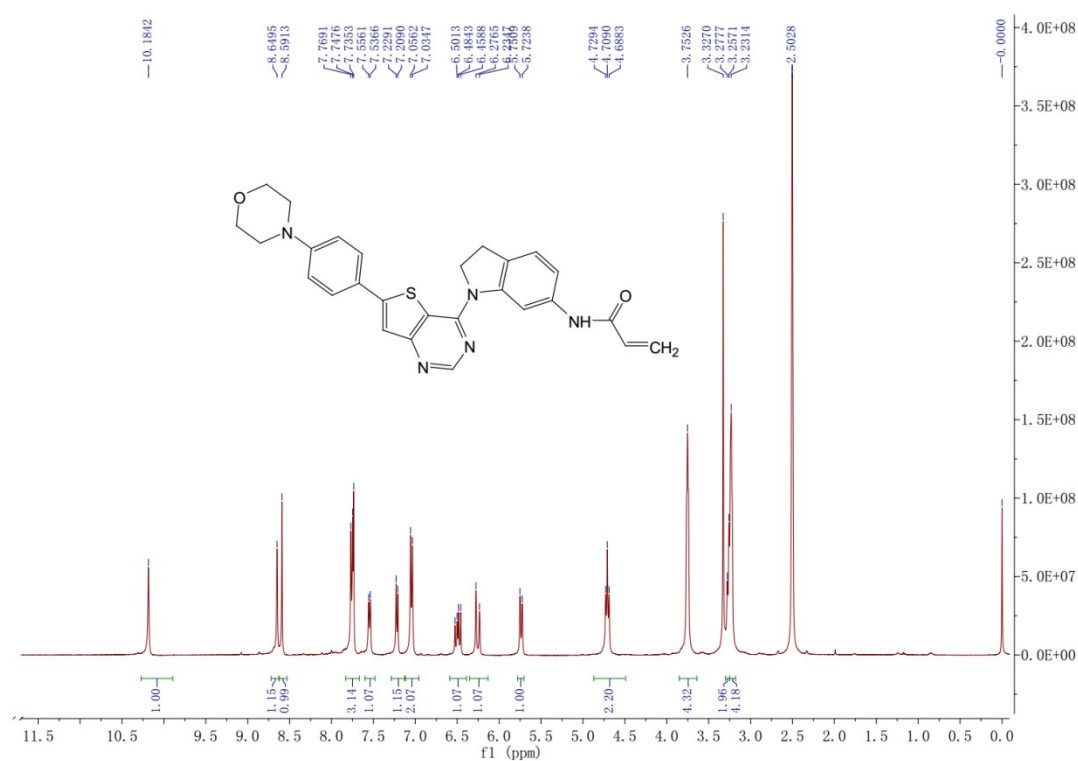

## 1: TOF MS ES+

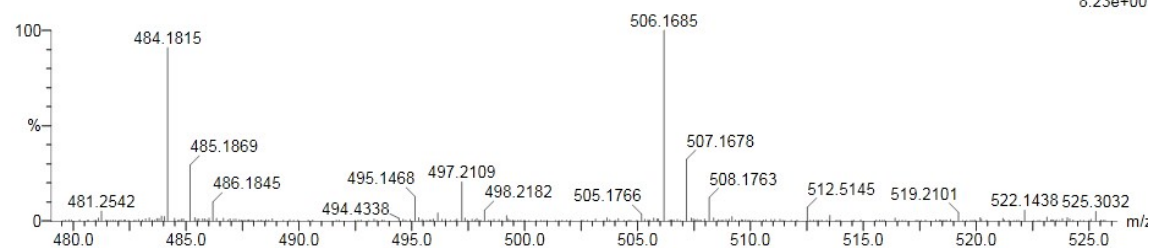

# The IC<sub>50</sub> curves of compounds **7**, **8** and Olmutinib against BTK and EGFR

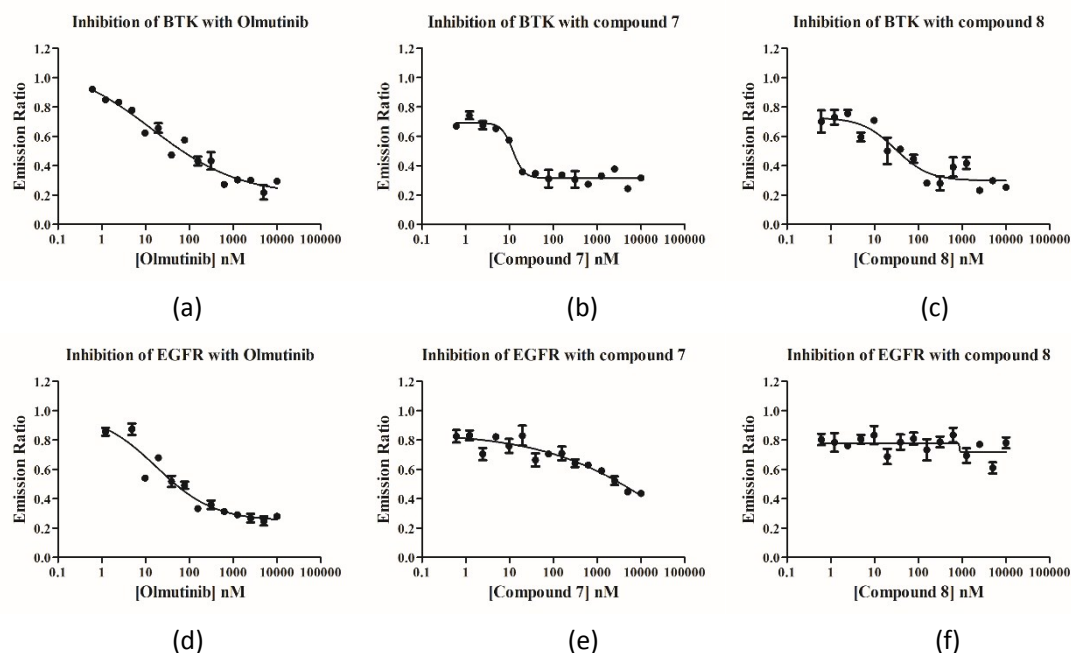

Fig. S1. The inhibition of compounds **7**, **8** and Olmutinib against BTK and EGFR: (a) The inhibition of Olmutinib against BTK; (b) The inhibition of compound **7** against BTK; (c) The inhibition of compound **8** against BTK; (d) The inhibition of Olmutinib against EGFR; (e) The inhibition of compound **7** against EGFR; (f) The inhibition of compound **8** against EGFR.
